# Supplementary material
Source: PubMed Central journal article supplement (PMC7655326)
Supplement: 17-00602.pdf [file 17-00602.pdf]

**On-line Table: Review of literature—cases of spinal arteriovenous malformation with concomitant neural tube defects**

|                                   | Age (yr), Sex | Fistula Location | Treatment (Embolitic Agent) | Length of Symptoms (mo) | Presentation     |                     |                          |                |                | Long-Term Outcome (mo) | Length of Clinical FU | Prior Surgery | Associated NTD |
|-----------------------------------|---------------|------------------|-----------------------------|-------------------------|------------------|---------------------|--------------------------|----------------|----------------|------------------------|-----------------------|---------------|----------------|
|                                   |               |                  |                             |                         | Sensory Symptoms | Bladder Dysfunction | Bowel/Sexual Dysfunction | Motor Symptoms | Motor Symptoms |                        |                       |               |                |
| Kendall and Logue <sup>8</sup>    | 3, F          | L                | Sg                          | 12                      | Y                | Y                   | N                        | Y              | Y              | ↑                      | NA                    | N             | IL             |
| Worstman et al <sup>21</sup>      | 69, F         | S                | E(PVA)                      | 72                      | Y                | Y                   | Y                        | Y              | Y              | ≈                      | 6                     | Y             | TC             |
| Rice and Jelsma <sup>16</sup>     | 23, F         | C-T              | B(PVA)                      | 2                       | Y                | N                   | N                        | Y              | Y              | ↑                      | 6                     | Y             | IL             |
| Djindjian et al <sup>4</sup>      | 53, M         | S                | B(NA)                       | 6                       | Y                | Y                   | N                        | Y              | Y              | ≈                      | 6                     | N             | IL             |
| Chatkupt et al <sup>2</sup>       | 20, F         | C                | Sg                          | 1                       | NA               | NA                  | NA                       | NA             | NA             | NA                     | NA                    | Y             | IL             |
| König et al <sup>9</sup>          | 50, M         | S                | Sg                          | 48                      | Y                | Y                   | Y                        | Y              | Y              | NA                     | NA                    | N             | IL             |
| Hurst et al <sup>7</sup>          | 21, F         | S                | E(NA)                       | 4                       | Y                | Y                   | Y                        | Y              | Y              | ↑                      | NA                    | N             | TC             |
| Cheung et al <sup>3</sup>         | 46, M         | T                | Sg                          | 84                      | Y                | Y                   | N                        | Y              | Y              | ↑                      | 9                     | Y             | IL + TC        |
| Lee et al <sup>11</sup>           | 44, M         | S                | B(NBCA)                     | 60                      | Y                | N                   | N                        | N              | N              | ↑                      | 6                     | N             | IL             |
| Weon et al <sup>20</sup>          | 30, M         | L-S              | B(NBCA)                     | 6                       | Y                | N                   | N                        | Y              | Y              | ↑                      | 4                     | N             | IL             |
| Rajeev and Panikar <sup>15</sup>  | 44, F         | L                | Sg                          | 6                       | Y                | Y                   | Y                        | Y              | Y              | ↑                      | 3                     | N             | IL             |
| Tubbs and Oakes <sup>19</sup>     | 0.1, M        | S                | Sg(NA)                      | NA                      | NA               | NA                  | NA                       | NA             | NA             | NA                     | 108                   | NA            | IL             |
|                                   | 0.16, M       | S                | Sg(NA)                      | NA                      | NA               | NA                  | NA                       | NA             | NA             | NA                     | 48                    | NA            | IL             |
| Erdogan et al <sup>5</sup>        | 40, M         | L                | B(Onyx)                     | 36                      | Y                | N                   | N                        | Y              | Y              | ↑                      | 2                     | N             | IL             |
| Lim et al <sup>2</sup>            | 63, F         | L                | E                           | 1                       | N                | Y                   | Y                        | Y              | Y              | ↑                      | 6                     | N             | MMC            |
| Macht et al <sup>13</sup>         | 57, M         | S                | E(glue)                     | 18                      | Y                | Y                   | Y                        | Y              | Y              | ↑                      | NA                    | N             | DS             |
| Chanthanaphak et al <sup>1</sup>  | 57, M         | S                | Sg                          | 5                       | Y                | Y                   | Y                        | Y              | Y              | ↑                      | NA                    | N             | MMC            |
| Sato et al <sup>17</sup>          | 72, M         | L                | E(NBCA)                     | 2                       | Y                | Y                   | NA                       | Y              | Y              | ↑                      | NA                    | N             | IL + TC        |
| Mavani and Nadkarni <sup>14</sup> | 29, M         | L                | Sg                          | 48                      | Y                | Y                   | N                        | Y              | Y              | ↑                      | 6                     | Y             | IL             |
| Krisht et al <sup>10</sup>        | 58, F         | L                | B(Onyx)                     | 2                       | Y                | Y                   | NA                       | Y              | Y              | ↑                      | 6                     | Y             | IL             |
| Srinivasan et al <sup>18</sup>    | 21, M         | L                | E                           | 2                       | Y                | Y                   | N                        | Y              | Y              | ↑                      | 18                    | N             | IL + TC        |

**Note:**—Sg indicates surgery; E, embolization; B, combined approach; embolization and surgery; L, lumbar; S, sacrum; PVA, polyvinyl alcohol; C-T, cervicothoracic; L-S, lumbosacral; T, thoracic; ↑, improved; ≈, no change; N, no; Y, yes; NA, not available; NTD, neural tube defect; TC, tethered cord; IL, intrathecal lipoma; MMC, myelomeningocele; DS, diastematomyelia; NBCA, N-butyl cyanoacrylate; C, cervical; FU, follow-up.
